# Detrimental Effects of Microgravity on Mouse Preimplantation Development In Vitro

Sayaka Wakayama<sup>1</sup>, Yumi Kawahara<sup>2</sup>, Chong Li<sup>1,3</sup>, Kazuo Yamagata<sup>1</sup>, Louis Yuge<sup>2</sup>, Teruhiko Wakayama<sup>1,3\*</sup>

**1** Laboratory for Genomic Reprogramming, RIKEN, Center for Developmental Biology, Kobe, Japan, **2** Division of Bio-Environment Adaptation Sciences, Graduate School of Health Sciences, and Space Bio-Laboratories, Hiroshima University, Hiroshima, Japan, **3** Department of Bioscience, Graduate School of Science and Technology, Kwansai Gakuin University, Sanda, Japan

## Abstract

Sustaining life beyond Earth either on space stations or on other planets will require a clear understanding of how the space environment affects key phases of mammalian reproduction. However, because of the difficulty of doing such experiments in mammals, most studies of reproduction in space have been carried out with other taxa, such as sea urchins, fish, amphibians or birds. Here, we studied the possibility of mammalian fertilization and preimplantation development under microgravity ( $\mu\text{G}$ ) conditions using a three-dimensional (3D) clinostat, which faithfully simulates  $10^{-3}$  G using 3D rotation. Fertilization occurred normally in vitro under  $\mu\text{G}$ . However, although we obtained 75 healthy offspring from  $\mu\text{G}$ -fertilized and -cultured embryos after transfer to recipient females, the birth rate was lower than among the 1G controls. Immunostaining demonstrated that in vitro culture under  $\mu\text{G}$  caused slower development and fewer trophoblast cells than in 1G controls but did not affect polarization of the blastocyst. These results suggest for the first time that fertilization can occur normally under  $\mu\text{G}$  environment in a mammal, but normal preimplantation embryo development might require 1G.

**Citation:** Wakayama S, Kawahara Y, Li C, Yamagata K, Yuge L, et al. (2009) Detrimental Effects of Microgravity on Mouse Preimplantation Development In Vitro. PLoS ONE 4(8): e6753. doi:10.1371/journal.pone.0006753

**Editor:** Sudhansu Kumar Dey, Cincinnati Children's Research Foundation, United States of America

**Received:** June 15, 2009; **Accepted:** July 22, 2009; **Published:** August 25, 2009

**Copyright:** © 2009 Wakayama et al. This is an open-access article distributed under the terms of the Creative Commons Attribution License, which permits unrestricted use, distribution, and reproduction in any medium, provided the original author and source are credited.

**Funding:** Financial support for this research was provided by a Scientific Research in Priority Areas (15080211) to T. W. The funders had no role in study design, data collection and analysis, decision to publish, or preparation of the manuscript.

**Competing Interests:** The authors have declared that no competing interests exist.

\* E-mail: teru@cdb.riken.jp

## Introduction

Changes in the gravitational field have significant effects on the development of plants and animals [1]. Therefore, the potential effect of a microgravity ( $\mu\text{G}$ ) environment on reproduction has been a major biological theme in the age of space exploration. So far, several experiments on reproduction in such environments have been reported using sea urchins, fish, amphibians and birds, and the fertilization rates were similar to those found in controls at normal gravity (1G) [1–7]. However, unlike the other taxa studied to date, mammalian reproduction is complicated and highly specialized. Oocytes do not have enough resources to support full term development, so after fertilization, the embryo needs to implant in the uterus and to be supplied from the mother via the placenta. Studies on rats have shown that  $\mu\text{G}$  affected reproduction: there were decreased total sperm numbers [8], increases in sperm abnormalities [9] and reduced testicular weights during space flight [10,11]. In the STS-80 space shuttle mission, mouse 2-cell embryos were collected on the ground, launched into space and cultured for four days in  $\mu\text{G}$ . The control embryos on Earth developed to normal blastocysts, but in the space flight group, none of the embryos showed any sign of development, and all degenerated [12]. A more reliable experiment was done on the Cosmos 1129 mission in 1979, when mature male and female rats were sent into orbit and then allowed to intermingle in a common breeding chamber [13]. However, none of the females gave birth,

although postflight examinations revealed that ovulation had occurred. Two of the females were reported to have achieved pregnancy, but the embryos appear to have been resorbed. Although this experiment did not examine whether fertilization or preimplantation development occurred normally, this raised the important question of whether mammalian reproduction is indeed possible in space. However, further such experiments have not been performed so far because of technical difficulties in using live animals. Mammalian reproduction is very sensitive to environmental factors. For example, with mice and rats, if the breeding room is changed, the estrous cycle is altered, the number of oocytes ovulated is reduced and mating can fail [14]. If mice were to be taken into space, they would be exposed to strong vibrations and hypergravity during the launch, and then suddenly exposed to the additional stress of  $\mu\text{G}$  conditions. In these situations, it is highly unlikely that the mice would copulate during the flight period. Actually, in the Cosmos 1129 mission, there were no pregnancies even among the ground-based 1G controls [15].

In vitro fertilization (IVF) might solve this problem if we could launch oocytes and sperm into space instead of live animals. On the ground, mouse IVF is now well established [16,17]. However, to perform IVF in space, we must develop several new techniques. For example, oocytes lose their fertilizability soon after ovulation [18]; therefore, it is impossible to collect oocytes from animals and preserve them for use in space environments before launch. Oocyte and sperm cryopreservation could be used to store the

gametes for IVF in space, but oocyte freezing is still imperfect [19]. Moreover, IVF is a difficult biological procedure, and fertilization can fail even in a ground-based laboratory if the experimentalist is inexperienced.

Methods for simulating  $\mu$ G on Earth have been investigated as alternatives to expensive space flight. A microgravity condition can be produced either by a space flight or by a free fall. However, the duration of a microgravity condition produced by a free fall is usually too short to alter cell growth and differentiation. Because of limited access to space flight, many efforts have been made to establish alternative methods for simulating microgravity on Earth, and one of these—the ‘clinostat’—is considered to be a suitable device. The clinostat mimics  $\mu$ G by ‘nullifying the gravitational vector’ through continuous averaging of G forces using three-dimensional (3D) rotation (see Movie S1) [20]. Moreover, this device can subject the specimen to  $\mu$ G conditions immediately, without exposure to the hypergravity and strong vibrations of a space launch. This allows the investigator to test the effects of  $\mu$ G conditions in isolation from other physical factors.

In earlier studies, the clinostat was rotated only in a single dimension (1D), such as horizontal rotation [21] or vertical rotation [22,23], which generated extra centrifugal forces and made it difficult to nullify the gravitation vector fully. Although the USA’s National Aeronautics and Space Administration (NASA) has improved this system [24], the results of some papers have been contradictory [22,25]. Recently, a 3D clinostat has been developed to generate a multidirectional G force, resulting in a more accurate environment averaging  $10^{-3}$  G [25–27], which is the same as inside a space shuttle (Movie S1). Several studies of cultured cells have been published using a 3D clinostat [28], and the results were similar to true space experiments [29], which validated its effectiveness for simulation [30]. Therefore, 3D clinostat experiments will help in predicting and planning real space experiments, which can reduce costs and effort.

Interestingly, one recent study discovered that the  $\mu$ G condition generated by a 3D clinostat inhibits the differentiation of stem cells [25]. Thus, a 3D clinostat might have clinical applicability in regenerative medicine to help proliferate stem cells for patients. However, if this effect is also true for undifferentiated early embryos, they might fail to differentiate or develop to offspring.

In the present study, we examined *in vitro* fertilization and preimplantation development in the mouse under  $\mu$ G using a 3D clinostat. To evaluate the embryos, some were examined for quality and cell numbers by immunostaining, and others were transferred into pseudopregnant recipient females to test their potential for development to full term.

## Results

### Effects of $\mu$ G on *in vitro* fertilization (IVF)

At 6 h after IVF, the clinostat was stopped, and zygotes were collected from the culture flasks. Control studies at 1G were performed using the same batch of preincubated spermatozoa and the same incubator but outside the clinostat (Fig. 1a, arrow). The fertilization rate, judged by second polar body extrusion, was very similar between 1G and  $\mu$ G (Fig. 2a, Table 1). We also confirmed the normality of zygotes by pronuclear (PN) staining (Fig. 2b). In  $\mu$ G conditions, although polyspermic 3-PN zygotes were significantly more frequent than controls, there was a lower rate of parthenogenetically activated 1-PN zygotes. This suggests that mouse sperm motility might be enhanced slightly under  $\mu$ G. Similar phenomena were observed in actual space experiments using sea urchin and bull spermatozoa [31,32]. However, most of these oocytes (84%) were fertilized normally, judged by second

polar body extrusion and the presence of 2 PN: similar to 1G controls (80%; Table 1). Therefore,  $\mu$ G appears to have no harmful effects on mouse gametes—at least in terms of fertilization *in vitro*.

### Effects of $\mu$ G on development *in vivo*

To demonstrate the normality of  $\mu$ G fertilized and cultured embryos, the strongest evidence is to show the potential to develop to full-term offspring. Therefore, we transferred  $\mu$ G-generated embryos at either the 2-cell stage (24 h culture) or the blastocyst stage (96 h culture) to oviduct of 0.5 dpc or uteri of 2.5 dpc recipient pseudopregnant females, respectively. In this experiment, to mimic the  $\mu$ G condition exactly, embryos were cultured continuously in the clinostat from IVF to the time of embryo transfer. Therefore, we could not determine the exact fertilization or embryo development rates in each flask. However, control 1G experiments were performed under exactly the same conditions (Fig. 1a) except that they were outside the clinostat.

As shown in Table 2, when embryos were collected from  $\mu$ G-cultured flasks at 24 h, more than half of the embryos had developed to the 2-cell stage (Fig. 2c), without any difference from controls. However, after transfer to recipient females, the rate of production of offspring from  $\mu$ G-cultured embryos (35%) was significantly less than with the 1G controls (63%). When embryos were collected from the  $\mu$ G culture flask at 96 h, the rate of development to the blastocyst stage (30%; Fig. 2d) was also significantly lower than control cultures (57%). It should be noted that these control results are poorer than with conventional IVF methodology [16–18,33–37]. As discussed above, the use of a flask and a large volume of medium were essential in using the 3D clinostat system, and our preliminary experiments showed that these had negative effects on embryo development. However, the  $\mu$ G experiments and control studies were done at exactly the same time and under the same conditions, except for the use of the 3D clinostat (Fig. 1a, arrow). Therefore, we believe that our results are valid.

After transferring blastocysts to recipient females (see Table 3), the rate of producing live offspring from  $\mu$ G-cultured embryos (16%; Fig. 2e) was also significantly lower than with the 1G controls (37%). Although fewer offspring resulted from  $\mu$ G culture than in the 1G controls, their body and placental weights were within normal range, and the mice grew to adulthood. Three male and three female mice derived from the  $\mu$ G-cultured blastocyst transfers were selected at random and paired for mating. All pairs delivered litters a few months later (Fig. 2f), demonstrating that the fertility of  $\mu$ G-generated offspring was normal.

### Effect of $\mu$ G for cell differentiation and polarization of blastocyst

As shown in Table 2 and Table 3, 96 h culture in  $\mu$ G conditions caused a reduced rate of development to the blastocyst stage, as well as reduced full-term development following transfer. To examine the reason for this low rate of development in  $\mu$ G conditions, we examined the quality of blastocysts based on cell number (Table 4), cell differentiation and polarity, using immunostaining (Fig. 3). In mice, the transcription factor Oct4 is expressed throughout preimplantation development and is restricted to the inner cell mass (ICM) at the blastocyst stage [38–43]. Oct4 is required for the maintenance of ICM fate and the pluripotency of ES cells. Trophectoderm (TE) differentiation begins before the downregulation of Oct4 in the outer cells and is marked by Cdx2 expression. Therefore, only Cdx2-positive cells were judged as differentiated, and only Oct4 positive cells were judged as undifferentiated. Oct4/Cdx2 double-positive cells were

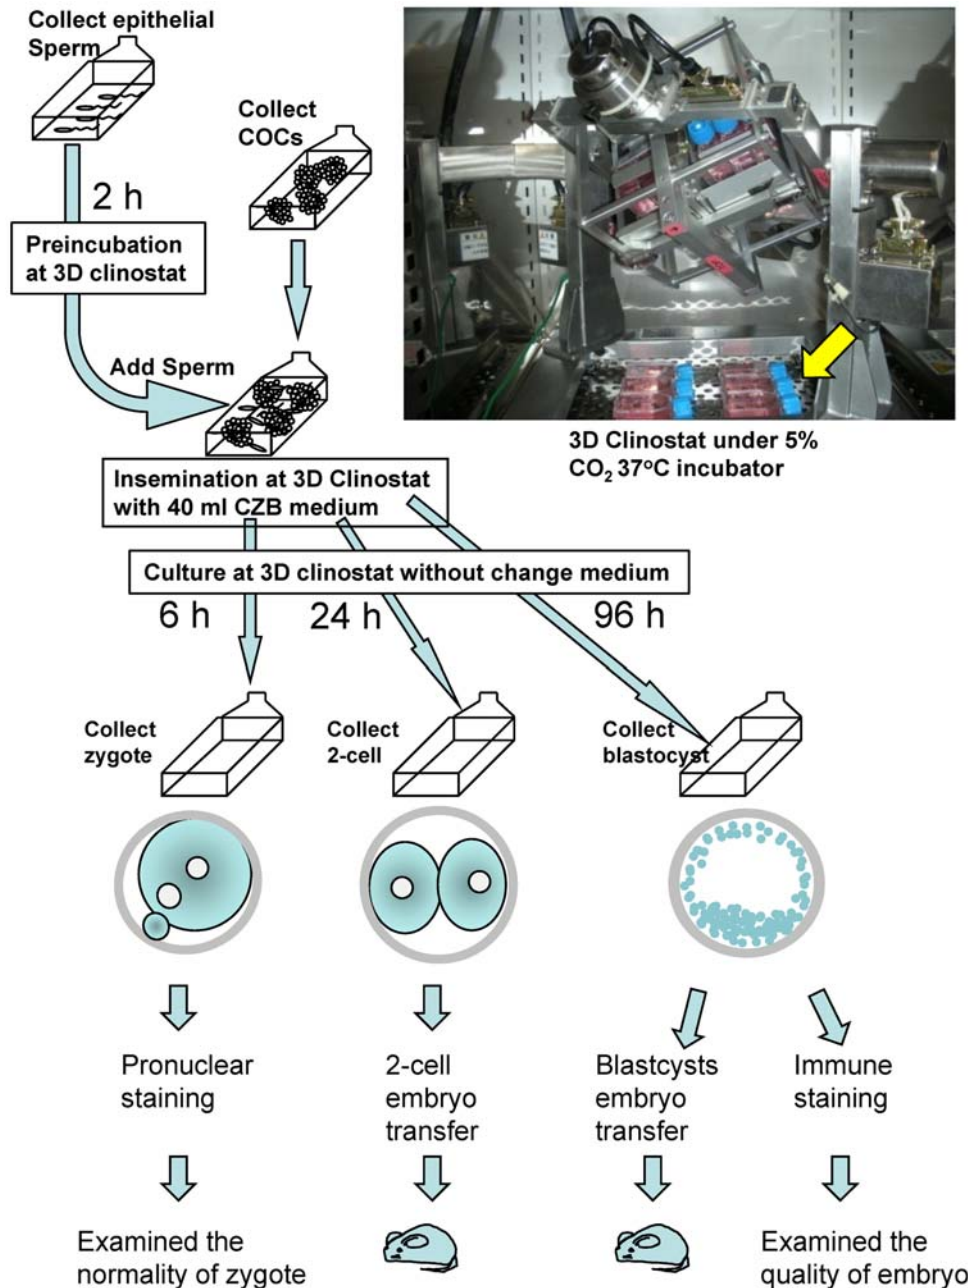

**Figure 1. Experimental procedure and 3D clinostat.**  
doi:10.1371/journal.pone.0006753.g001

judged as transition stage from undifferentiated to differentiated. Nonreactive cells that were DAPI positive (nuclear staining) were judged to be in metaphase.

We examined 21 of the  $\mu$ G-cultured blastocysts and 26 control 1G blastocysts. The mean ICM cell number in  $\mu$ G blastocysts (8.0 cells) was almost same as in the 1G controls (8.7 cells; Fig. 3d, i; red). However, downregulation of Oct4 was incomplete in the  $\mu$ G blastocysts, and the numbers of cells that were doubly positive for Oct4 and Cdx2 were increased significantly (Fig. 3d, i; yellow). There were fewer completely differentiated TE cells in  $\mu$ G-cultured blastocysts (5.9 cells) than in 1G controls (17.0 cells) (Fig. 3d, i; green). In addition to cell number, we also observed the localization of the ICM in blastocysts using a 3D imaging system (Fig. 3k and l and Movie S2 and S3). If ground-level gravity is

essential for polarity in the blastocyst, the localization of the ICM in  $\mu$ G-cultured blastocysts might be impaired, and this could allow Oct4-positive cells to disperse into the blastocoel. However, the ICM was located normally in all the  $\mu$ G-cultured blastocysts. These results suggest that  $\mu$ G culture conditions impaired both the rate of embryo growth to the blastocyst and differentiation into the TE lineage. Nevertheless, polarization of the ICM and TE components was unaffected.

## Discussion

In this study, we produced healthy offspring from embryos produced under  $\mu$ G conditions including sperm preincubation, IVF and in vitro culture to the blastocyst stage. IVF occurred



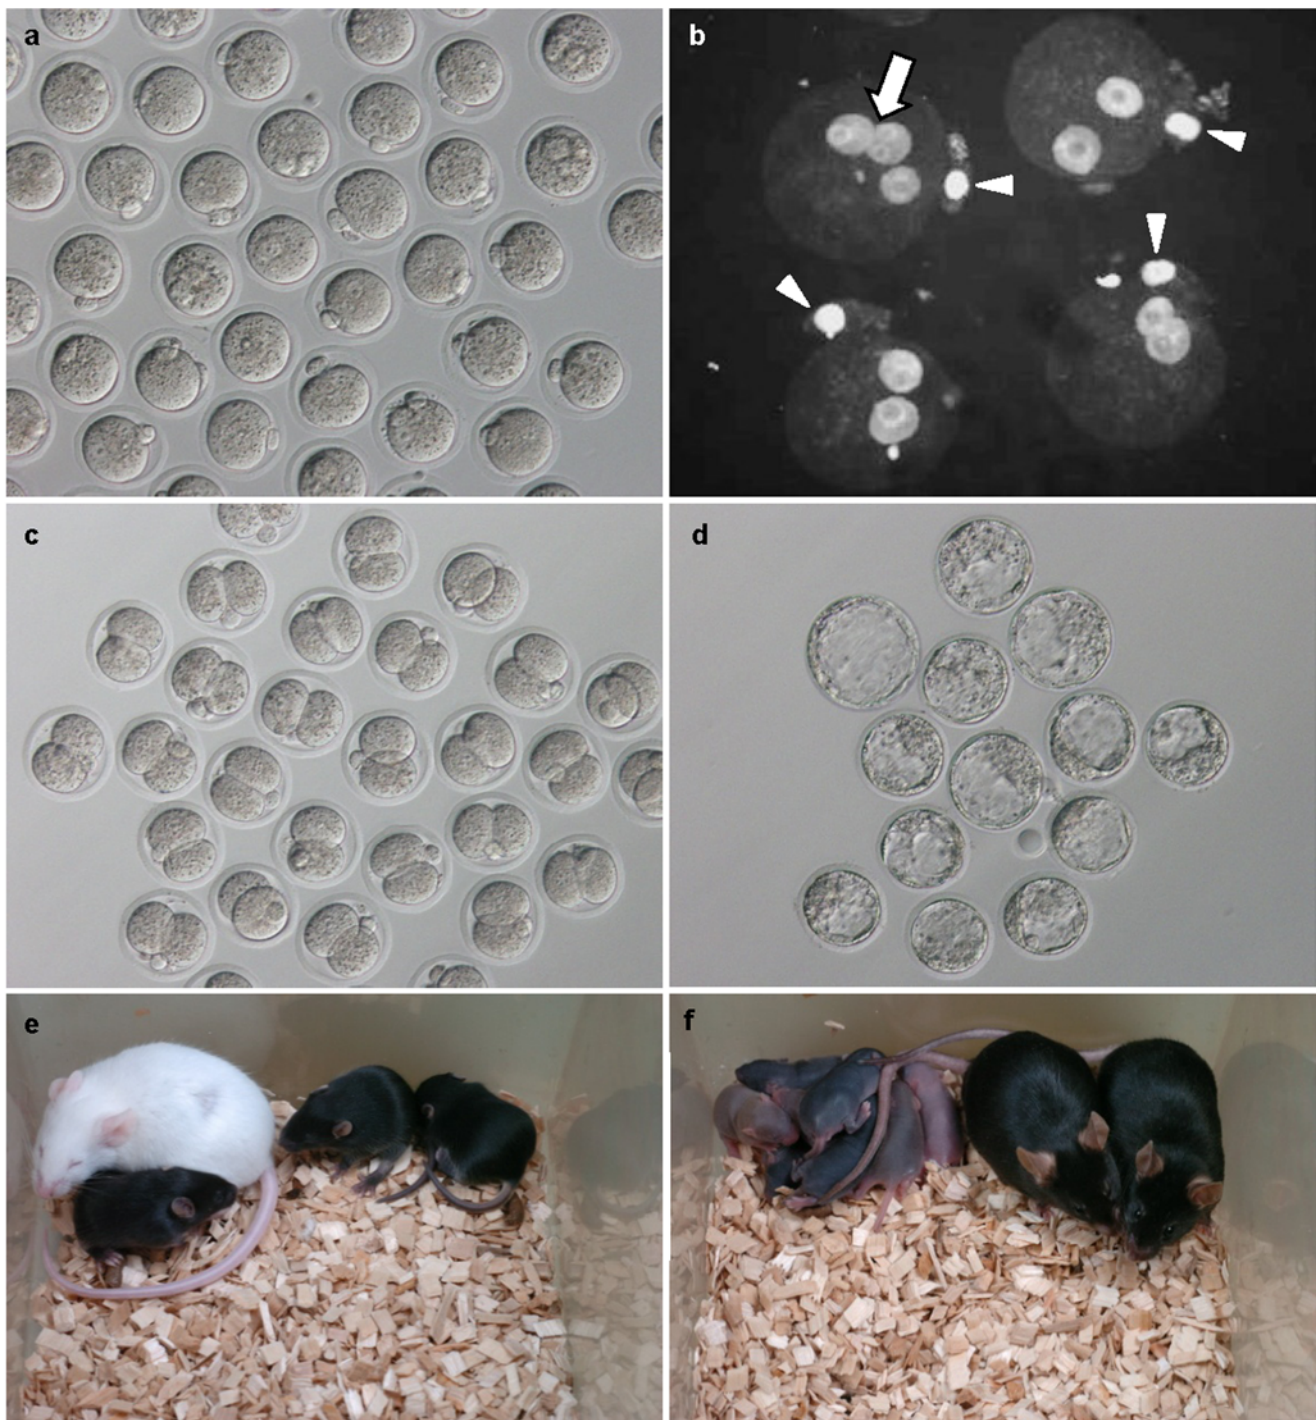

**Figure 2. Preimplantation development of microgravity ( $\mu$ G)-fertilized and -cultured embryos and development of full-term offspring.** Mouse oocytes were fertilized with spermatozoa preincubated under  $\mu$ G. (a) Zygote at 6 h after insemination. (b) Nuclear staining with DAPI. The arrow indicates a polyspermic (3 PN) fertilized zygote, and the arrowhead indicates a second polar body. (c) Two-cell stage embryo cultured for 24 h under  $\mu$ G. (d) Blastocyst cultured for 96 h under  $\mu$ G. (e) Offspring derived from  $\mu$ G-fertilized and -cultured blastocysts. Two to three months later, these offspring grew to adulthood, and randomly selected mice were proven fertile in natural mating (f).  
doi:10.1371/journal.pone.0006753.g002

normally under  $\mu$ G conditions. However, the quality of blastocysts grown under  $\mu$ G conditions was reduced.

The production of healthy offspring is the strongest evidence of the normality of  $\mu$ G-fertilized embryos. At 24 h after IVF, although live offspring were born after embryo transfer into recipient females, the overall rate of production from the  $\mu$ G embryos was significantly

lower than in the 1G controls ( $p < 0.05$ ). Moreover, when culture periods were extended to 96 h in  $\mu$ G, the live birth rate was significantly lower than in controls (5% vs. 21%). Kojima et al. reported similar results using a 1D clinostat [44]. However, they showed no difference in offspring production rates between  $\mu$ G and 1G. Possibly this reflects differences between the 1D and 3D clinostat

**Table 1.** In vitro fertilization of mouse gametes under microgravity.

| Category        | Collected oocytes | Fertilized (total) | Parthenogenetic (%) | Polyspermic (%) | Normal (%) |
|-----------------|-------------------|--------------------|---------------------|-----------------|------------|
| 1G              | 203               | 184                | 33 (18)             | 2 (1)           | 149 (81)   |
| $\mu$ G         | 229               | 207                | 8 (4)               | 25 (12)         | 174 (84)   |
| <i>p</i> -Value |                   |                    | >0.01               | >0.01           | <0.01      |

doi:10.1371/journal.pone.0006753.t001

**Table 2.** In vitro development of embryos under microgravity.

| Culture period | Category. | <i>p</i> -Value | Collected embryos | In vitro development (%) |            |                 |
|----------------|-----------|-----------------|-------------------|--------------------------|------------|-----------------|
|                |           |                 |                   | No. abnormal             | No. 2-cell | No. blastocysts |
| 24 h           | 1G        | <0.05           | 51                | 24                       | 27 (53)    | –               |
|                | $\mu$ G   |                 | 494               | 230                      | 264 (53)   | –               |
| 96 h           | 1G        | >0.05           | 42                | 18                       | –          | 24 (57)         |
|                | $\mu$ G   |                 | 282               | 196                      | –          | 86 (30)         |

doi:10.1371/journal.pone.0006753.t002

**Table 3.** Production of offspring from embryos fertilized and cultured under microgravity.

| Culture period | Category. | <i>p</i> -Value | Embryo transfer | No. pups (%) | Weight (g) $\pm$ SD |                 |
|----------------|-----------|-----------------|-----------------|--------------|---------------------|-----------------|
|                |           |                 |                 |              | Pups                | Placenta        |
| 24 h (2-cell)  | 1G        | >0.05           | 27              | 17 (63)      | 1.49 $\pm$ 0.13     | 0.11 $\pm$ 0.02 |
|                | $\mu$ G   |                 | 172             | 61 (35)      | 1.40 $\pm$ 0.11     | 0.11 $\pm$ 0.02 |
| 96 h (Blast)   | 1G        | >0.05           | 24              | 9 (38)       | 1.46 $\pm$ 0.15     | 0.13 $\pm$ 0.02 |
|                | $\mu$ G   |                 | 86              | 14 (16)      | 1.41 $\pm$ 0.12     | 0.12 $\pm$ 0.03 |

doi:10.1371/journal.pone.0006753.t003

environments. Another possibility for the discrepancy is that they transferred zygotes (6 h after IVF) into recipient females, whereas we transferred 2-cell embryos (24 h after IVF), which reinforces the idea that prolonged  $\mu$ G culture impairs embryo quality.

These results strongly suggest that although fertilization had occurred normally,  $\mu$ G conditions had a harmful effect on embryo development even after one day of exposure. If we could remove the negative effects of a large volume of medium, for example by using a completely self-contained microfluidics chamber, this could facilitate study on the real effects of  $\mu$ G.

In this study, 61 and 14 pups were obtained from embryos cultured for 24 h or 96 h under  $\mu$ G conditions, respectively. All

these offspring appeared normal, and randomly selected animals were later proven fertile by natural mating. This suggests that, although embryo growth was impaired under  $\mu$ G conditions, some of the treated embryos maintained a normal potential for development. However, obviously the recipient females could not be kept in the clinostat, so implantation and gestation in vivo was at 1G. The  $\mu$ G-fertilized and -cultured embryos would thus have spent about 2 days (2-cell embryo transfer) or half a day (blastocyst transfer) in female body under 1G conditions before implantation. It is possible that even if all the  $\mu$ G-fertilized and -cultured embryos were abnormal, this was corrected in some embryos before implantation.

**Table 4.** Cell numbers and populations in microgravity-fertilized and cultured blastocysts.

| Category.       | Total cell number | No. TE cells (%)     | No. transition (%) | No. ICM cells (%)  | No. M phase cells (%) |
|-----------------|-------------------|----------------------|--------------------|--------------------|-----------------------|
|                 |                   | (Cdx2 positive)      | (double positive)  | (Oct4 positive)    | (DAPI only)           |
| 1G              | 32.0 $\pm$ 10.4   | 17.0 $\pm$ 10.6 (53) | 3.5 $\pm$ 2.7 (11) | 8.7 $\pm$ 3.4 (27) | 2.8 $\pm$ 2.0 (9)     |
| $\mu$ G         | 22.3 $\pm$ 9.3    | 5.9 $\pm$ 5.6 (26)   | 5.3 $\pm$ 2.5 (24) | 8.0 $\pm$ 3.0 (36) | 3.2 $\pm$ 3.2 (14)    |
| <i>p</i> -Value | >0.05             | >0.05                | >0.05              | <0.05              | <0.05                 |

doi:10.1371/journal.pone.0006753.t004

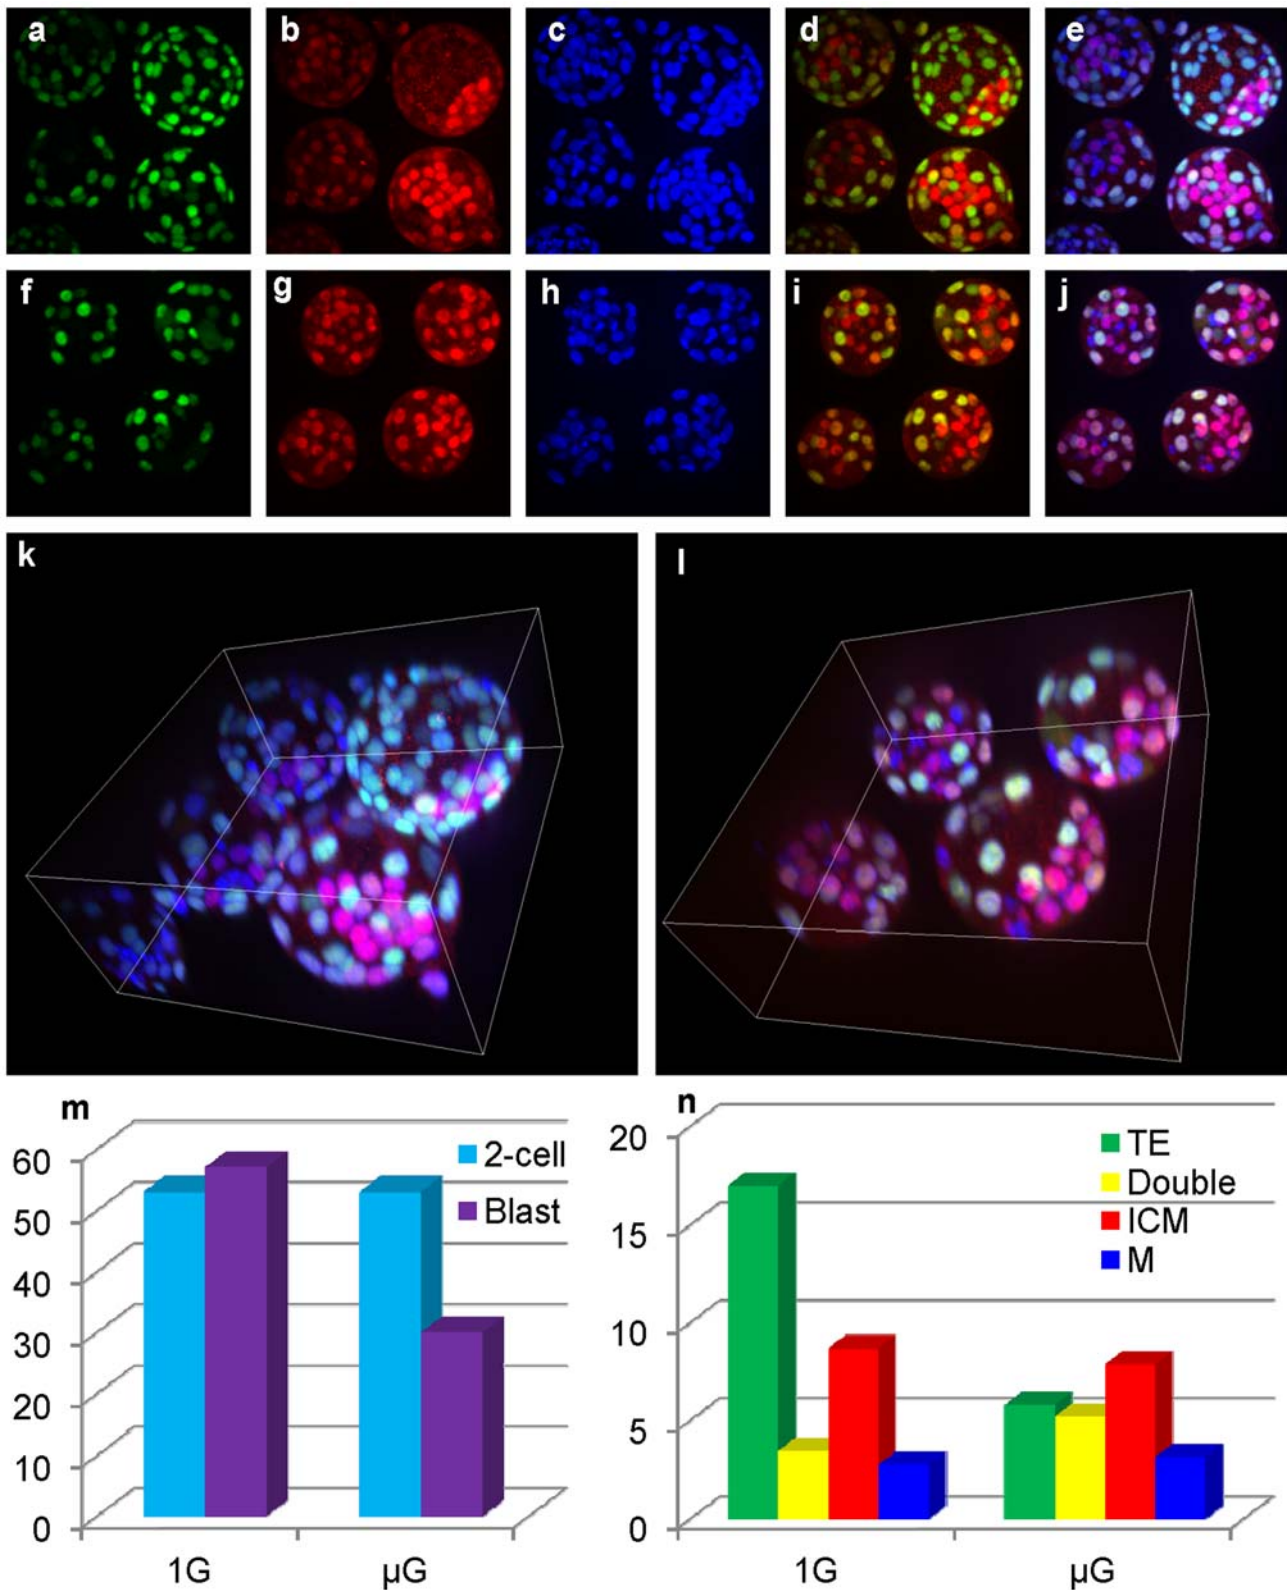

**Figure 3. Blastocyst quality after culture under microgravity.** The trophoblast (TE) and inner cell mass (ICM) cell numbers were counted by immunostaining for Cdx2 (a and f, green) or Oct4 (b and g, red), respectively. DNA was stained with DAPI (c and h, blue). Cdx2/Oct4 doubly positive cells were counted on merged images (d and i). Metaphase cells (DAPI staining only) were counted on triple-merged images (e and j). The ICM localization was examined using a three-dimensional (3D) viewer (k and l, and Movie S2 and S3). As we acquired 51 focal planes in the z-axis, we could determine the 3D structure of all embryos. (m) Rates of development to the 2-cell and blastocyst stages in 1G and  $\mu$ G culture systems. (n) Cell numbers and cell types compared between 1G- and  $\mu$ G-cultured blastocysts. doi:10.1371/journal.pone.0006753.g003



To test the effect of prolonged  $\mu$ G culture, we examined the quality of blastocysts by immunostaining at 96 h after IVF. The TE cell numbers in  $\mu$ G-cultured blastocysts were significantly lower than in the 1G controls, whereas the numbers of other cell types were unaffected (Fig. 3n). There are two possible explanations. One is that  $\mu$ G conditions slow embryo growth rates, another is that they affect the potential for cell differentiation. It was reported that the  $\mu$ G conditions generated by a 3D clinostat inhibited stem cell differentiation [25]. However, it is unclear whether this also affects mammalian embryos. However, if so,  $\mu$ G conditions appear to inhibit the differentiation of TE cells from totipotent blastomeres, rather than slowing embryo growth. On the other hand, the localization of the ICM in  $\mu$ G-cultured blastocysts appeared normal. In amphibians, in which the zygotes show strong polarity during early cell division,  $\mu$ G had no harmful effect on embryo development [45]. Thus, the effects of  $\mu$ G might be limited to embryonic cell growth rate or differentiation, but  $\mu$ G does not appear to impair cell localization within the blastocyst. In other words, the polarization of preimplantation embryos was independent of gravity in this model.

Unlike studies on early development, far more space research has focused on the latter half of pregnancy, during which many of the early, sensitive phases of development including placentation and early organogenesis normally occur at 1G. Thus far, female rats at several different stages of pregnancy have been launched into space. These data provide clear evidence that rats kept in space at  $\mu$ G during the latter half of their pregnancies are able to sustain normal body weight gains and to support the growth and development of their gestating offspring [46–50]. These results were consistent with those for other species, especially urodeles [51] and fish [3,52]. For example, salamander and Medaka fish eggs can be fertilized and develop normally during orbital flight [2,45]. Those results and ours combined suggest that  $\mu$ G conditions do not affect fertilization or later fetal development. However,  $\mu$ G impairs the development of preimplantation-stage mammalian embryos and possibly implantation as well. It will be very important to know whether implantation can occur in space under  $\mu$ G conditions. This question could be addressed when the Japanese Experiment Module ‘Kibo’ of the International Space Station (ISS) starts appropriate experiments.

## Materials and Methods

### Animals

B6D2F1 (C57BL/6J $\times$ DBA/2) mice were used as sources of oocytes and spermatozoa. ICR (CD-1) strain mice were used as pseudopregnant recipient. Both strains were obtained at 8–10 weeks of age from Japan SLC, Inc. (Hamamatsu, Japan). All animals were maintained in accordance with the Animal Experiment Handbook at the Center for Developmental Biology, RIKEN, Kobe, Japan. Female mice were induced to superovulate with consecutive injections of equine chorionic gonadotropin (5 IU) and human CG (hCG; 5 IU) 48 h apart. Fourteen hours after the hCG injection, mice were killed to collect oocytes.

**Ethics Statement.** The protocols for animal handling and treatment were reviewed and approved by the Animal Care and Use Committee at the same institution.

### Adaptation of IVF to the 3D clinostat system

In the conventional IVF protocol at 1G, mouse sperm are preincubated *in vitro* with 400  $\mu$ l of IVF medium for 1–2 h in an incubator at 37°C to develop their fertilization potential (capacitation) [16] and then capacitated spermatozoa are transferred into another 400  $\mu$ l of IVF medium containing oocytes. After 6 h culture, fertilized zygotes are collected, washed and then zygotes are cultured in a different dish with 20–50  $\mu$ l of embryo

culture medium. About 72 h after insemination, embryos that develop to morula/blastocyst (day 4) were transferred into day 3 pseudo-pregnant females to give live offspring.

On the other hand, the 3D clinostat system required us to use 12.5 cm<sup>2</sup> flasks filled (Falcon #353107, with a filter cap) with about 40 ml of medium: 100 times more than in conventional IVF. In addition, to maintain  $\mu$ G conditions completely, embryos were cultured in the same flask until the blastocyst stage without washing. In this situation, the culture volume is 1000 times greater than with the conventional culture system. Thus, before starting experiments, we had examined the effects of medium volume, of different media, and prolonged culture in a flask with continuous exposure to spermatozoa in terms of embryo development.

In preliminary IVF experiments, we examined the effect of  $\mu$ G on sperm preincubation, and there was no difference from control studies (data not shown). Therefore, we used spermatozoa capacitated in  $\mu$ G conditions for all experiments. Although sperm were preincubated in IVF medium (TYH; Mitsubishi Kagaku, Tokyo) [16], insemination was performed in embryo culture medium (CZB) [53] rather than TYH medium, because the zygotes needed to be cultured continuously under  $\mu$ G conditions without a wash step. However, the fertilization rate with this system was almost the same as with conventional IVF (91% and 88%, respectively; repeated three times). This result suggests that IVF can be achieved without any problem in embryo culture medium rather than IVF medium, and that the large amount of medium in the  $\mu$ G flask had no effect on this outcome.

In terms of extended culture, we have compared the rate of blastocyst development in the flask culture method with the standard protocol outlined above. At 96 h after IVF, the rate of blastocyst development was significantly decreased in flask cultures compared with routine dish cultures (63% vs 97%, respectively; repeated three times). Although a low embryo-to-culture volume ratio is critical for the optimal development of embryos *in vitro* [54–56] it would be impossible to produce sufficient numbers of embryos to compensate for the 1000-fold greater volume of flasks compared with microdroplets in dishes. This suggests that a decrease in the rate of blastocyst development is inevitable when using a relatively large flask. However, even if the large volume of medium affects embryo development, in this study the 1G controls and  $\mu$ G experiments were performed in exactly the same conditions, except for the use of the 3D clinostat (see Fig. 1 arrow). Therefore, this appropriate control enabled us to identify the exact effects of  $\mu$ G during IVF and embryo development.

In terms of embryo transfer, in the standard protocol, *in vitro*-produced/manipulated embryos are transferred into 1-day-delayed pseudopregnant females to compensate for the timing of development. Therefore, 2-cell-stage embryos at 24 h after insemination (day 2), or morulae/blastocysts at 72 h after insemination (day 4) are normally transferred into the oviduct (day 1) or uterus (day 3), respectively. However, we noticed that when embryos were cultured in flasks, blastocyst development was retarded and the embryos required 5 days to develop to the expanded stage. In addition, it was known that the developmental potential of offspring was unaltered when embryos were cultured *in vitro* for 4 or 5 days. However, when embryos were cultured for 6 days, the implantation rates of transferred embryos decreased significantly [57–59]. Therefore, in this study, 2-cell embryos were transferred into 1-day-delayed recipient females as usual. However, day 5 blastocysts were transferred into 2-day-delayed (day 3) recipient females. Although the rate of producing offspring after embryo transfer was lower than with the ordinary method (29% vs 57%, respectively; repeated three times), this modified method was entirely reproducible.

## Sperm and oocyte preparation

Mouse IVF medium (TYH) was added to the flask one day before experiments and equilibrated in a 37°C, 5% CO<sub>2</sub> incubator. Next day, epididymides were collected from two euthanized male mice. A dense sperm mass was squeezed out from the cut epididymis and placed into the flask. TYH medium was added to fill the flask without any bubbles. The flask was capped and placed in the 3D clinostat, which was then started. During sperm preincubation, oocyte cumulus complex (COCs) were collected from the oviducts of two or three females, and transferred into a Falcon flask filled with CZB medium that had been equilibrated for one day before use and then placed in the incubator until starting the experiment. Because COCs were used to enable high fertilization rates, we could not count the number of oocytes in each flask. However, after the experiments, we found that each flask had 60–100 oocytes.

## In vitro fertilization

After finish the sperm preincubation, the flasks were removed from the 3D clinostat, and 5 ml aliquots of sperm suspension were introduced into the flasks containing the oocytes. The average final sperm concentration of this method was about 10<sup>6</sup>/ml. CZB medium was added to fill the flask without any bubbles. The 3D clinostat was then started immediately. It took less than 20 min from collecting the sperm suspension to restart the 3D clinostat for IVF. In control experiments, IVF was performed under exactly the same conditions without using the 3D clinostat, and gametes were cultured in the same incubator at the same time (Fig. 1).

## Examination of $\mu\text{G}$ -fertilized zygotes

At 6 h after IVF, all oocytes were collected from the flasks and the fertilization rates were estimated, based on second polar body extrusion. Then all zygotes were fixed in 4% paraformaldehyde in phosphate buffered saline (PBS) for 30 min, washed twice with 1% bovine serum albumin (BSA) in PBS, transferred into 1% BSA–PBS containing 0.1% Triton X-100 (Nacalai Tesque Inc., Kyoto, Japan) and incubated overnight at 4°C. All zygotes were washed, and their DNA was stained with 6-diamidino-2-phenylindole (DAPI) (2  $\mu\text{g}/\text{mL}$ ; Molecular Probes Inc., Eugene, OR, USA). Some zygotes were incubated with a rabbit polyclonal antibody directed against histone H3 trimethyl K9 (ChIP grade; ab8898, Abcam plc, Cambridge, USA) at room temperature for 2 h before DNA staining. After the embryos had been washed twice in 1% BSA–PBS for 15 min each, they were incubated for 1 h with the fluorochrome-conjugated secondary antibody, Alexa Fluor 488-labeled chicken anti-rabbit IgG (Molecular Probes Inc.). This staining protocol is specific for the female PN. All the embryos were observed using a confocal scanning laser microscope (FV-1000, Olympus, Tokyo, Japan).

## Embryo transfer

At 24 h or 96 h after IVF, all embryos or oocytes were collected from the flasks. The rates of 2-cell or blastocyst development were calculated from all collected oocytes, including abnormally ovulated ones (these cannot be distinguished from unfertilized oocytes at this stage). Two-cell stage embryos were transferred to oviduct of pseudopregnant ICR mice at 0.5 days post copulation (dpc). These had been mated with a vasectomized ICR male the night before transfer. Blastocyst-stage embryos were transferred to the uteri of pseudopregnant mice at 2.5 (dpc). Six to 10 embryos were transferred into each oviduct or uterus, respectively [17,33,37]. At days 18.5 to 19.5 dpc, the offspring were delivered naturally or by cesarean section, and we recorded the body and

placental weights and sex. All offspring were fostered to other females to allow them to grow to adulthood. When they matured sexually, randomly selected males and females (three each) were paired and mated to confirm their fertility.

Note that the 3D clinostat culture was carried out in Hiroshima, and the animals were maintained in Kobe. Therefore, after finishing each experiment, the 1G control and  $\mu\text{G}$  culture flasks were moved from Hiroshima to Kobe, which takes 3 h, but the flasks were kept at 37°C in a warming box. As shown in the 1G control experiments, this short travel did not affect embryo development.

## Assessment of blastocyst quality by immunostaining

In preliminary experiments, we found that embryo development was slightly slower than normal in both  $\mu\text{G}$  and control 1G conditions when this modified IVF system was used. Therefore, in this study, we examined the quality of blastocysts at day 4.5 of culture (96 h after IVF).

In the 96 h experiments, all the embryos were fixed immediately after stopping the clinostat. The total cell numbers of blastocysts were counted, and localizations of the ICM and TE cells were observed by immunostaining. Briefly, blastocysts were fixed in 4% paraformaldehyde in PBS for 40 min at room temperature, washed twice with PBS containing 0.5% polyvinylpyrrolidone (Sigma-Aldrich, St Louis, MO, USA) and permeabilized with PBS containing 0.25% Triton X-100 (Nacalai Tesque, Inc.) for 20 min at room temperature (RT). After blocking with 1% BSA/PBS containing 0.1% Tween-20 (Sigma-Aldrich) for 1 h, the blastocysts were further incubated with the primary antibody diluted in the blocking solution at RT for 2 h. The antibodies used were anti-POU5F1/Oct3/4 rabbit polyclonal antibody (1:200; Santa Cruz Biotechnology, Inc., Santa Cruz, CA, USA) for detecting the ICM, and anti-CDX2 mouse monoclonal antibody (1:200; BioGenex, Inc., San Ramon, CA, USA) for detecting the TE. After the embryos had been washed twice in the blocking solution, they were incubated for 1 h with fluorochrome-conjugated secondary antibodies: Alexa Fluor 488-labeled goat anti-rabbit IgG (Molecular Probes, Inc.) or Alexa Fluor 568-labeled goat anti-mouse IgG (Molecular Probes, Inc.). The embryos were washed again, and their DNA was stained with 4',6-diamidino-2-phenylindole (DAPI) (2  $\mu\text{g}/\text{mL}$ ; Molecular Probes, Inc.).

To analyze the embryos three-dimensionally, the embryos were transferred to 5  $\mu\text{l}$  drops of 1% BSA–PBS in a glass-bottomed dish and observed under an inverted fluorescent microscope (IX-71, Olympus) equipped with a Nipkow disk confocal unit [17,37], exposed to three different wavelengths of excitation (405, 488 and 561 nm). Images sectioned optically at 2  $\mu\text{m}$  intervals (a total of 100  $\mu\text{m}$ ) were acquired in the *z*-axis, and three color images (blue, green and red) were captured. Device control and image analysis were performed using MetaMorph software (Molecular Devices, Sunnyvale, CA, USA).

## Statistical analysis

Outcomes were evaluated using  $\chi^2$  tests, and  $p < 0.05$  was regarded as statistically significant.

## Supporting Information

### Movie S1 3D clinostat inside CO<sub>2</sub> incubator

Found at: doi:10.1371/journal.pone.0006753.s001 (5.88 MB MOV)

**Movie S2** The localization of the ICM in blastocysts using a 3D imaging system (Control 1G)



Found at: doi:10.1371/journal.pone.0006753.s002 (9.52 MB MOV)

**Movie S3** The localization of the ICM in blastocysts using a 3D imaging system ( $\mu$ G)

Found at: doi:10.1371/journal.pone.0006753.s003 (8.86 MB MOV)

## Acknowledgments

We thank J. Cummins for critical and useful comments on the manuscript. We are grateful to the Laboratory for Animal Resources and Genetic

## References

- Serova LV (1989) [Effect of weightlessness on the reproductive system of mammals]. *Kosm Biol Aviakosm Med* 23: 11–16.
- Aimar C, Bautz A, Durand D, Membre H, Chardard D, et al. (2000) Microgravity and hypergravity effects on fertilization of the salamander *Pleurodeles wald* (urodele amphibian). *Biol Reprod* 63: 551–558.
- Ijiri K (2004) Ten years after medaka fish mated and laid eggs in space and further preparation for the life-cycle experiment on ISS. *Biol Sci Space* 18: 138–139.
- Schatten H, Chakrabarti A, Taylor M, Sommer L, Levine H, et al. (1999) Effects of spaceflight conditions on fertilization and embryogenesis in the sea urchin *Techinus pictus*. *Cell Biol Int* 23: 407–415.
- Souza KA, Black SD, Wassersug RJ (1995) Amphibian development in the virtual absence of gravity. *Proc Natl Acad Sci U S A* 92: 1975–1978.
- Tash JS, Kim S, Schuber M, Seibt D, Kinsey WH (2001) Fertilization of sea urchin eggs and sperm motility are negatively impacted under low hypergravitational forces significant to space flight. *Biol Reprod* 65: 1224–1231.
- Ubbels GA, Berendsen W, Naraway J (1989) Fertilization of frog eggs on a Sounding Rocket in space. *Adv Space Res* 9: 187–197.
- Sapp WJ, Philpott DE, Williams CS, Kato K, Stevenson J, et al. (1990) Effects of spaceflight on the spermatogonial population of rat seminiferous epithelium. *Faseb J* 4: 101–104.
- Fedorova N (1967) Spermatogenesis of the dogs. *Ugolyok and Veterok after their flight on board the satellite Kosmos 110*. *Kosm Biol Med* 1: 28.
- Amann RP, Deaver DR, Zirkin BR, Grills GS, Sapp WJ, et al. (1992) Effects of microgravity or simulated launch on testicular function in rats. *J Appl Physiol* 73: 174S–185S.
- Philpott DE, Sapp W, Williams C, Stevenson J, Black S, et al. (1985) Reduction of the spermatogonial population in rat testes flown on Space Lab-3. *Physiol* 28: S211–212.
- Schenker E, Forkheim K. Mammalian mice embryo early development in weightlessness environment on STS 80 space flight; 1998.
- Serova LV, Denisova LA (1982) The effect of weightlessness on the reproductive function of mammals. *Physiol* 25: S9–12.
- Keefe JR, ed (1985) Final report of the NASA mammalian developmental biology working group. Washington, DC: NASA. pp 46–63.
- Nagy A, Gertsenstein M, Vintersten K, Behringer R (2003) Manipulating the mouse embryo; A Laboratory Manual. New York: Cold Spring Harbor Laboratory Press.
- Toyoda Y, Yokoyama M, Hoshi T (1971) Studies on the fertilization of mouse eggs in vitro. *Japanese journal of Animal Reproduction* 16: 152–157.
- Yamagata K, Suetsugu R, Wakayama T (2009) Long-term, six-dimensional live-cell imaging for the mouse preimplantation embryo that does not affect full-term development. *J Reprod Dev* 55: 343–350.
- Wakayama S, Thuan NV, Kishigami S, Ohta H, Mizutani E, et al. (2004) Production of offspring from one-day-old oocytes stored at room temperature. *J Reprod Dev* 50: 627–637.
- Endoh K, Mochida K, Ogonuki N, Ohkawa M, Shimmen A, et al. (2007) The developmental ability of vitrified oocytes from different mouse strains assessed by parthenogenetic activation and intracytoplasmic sperm injection. *J Reprod Dev* 53: 1199–1206.
- Tremor JW, Souza KA (1972) The influence of clinostat rotation on the fertilized amphibian egg. *Space Life Sci* 3: 179–191.
- Marimuthu KM, Sparrow AH, Schairer LA (1970) The cytological effects of space flight factors, vibration, clinostat and radiation on root tip cells of *Tradescantia*. *Radiat Res* 42: 105–119.
- Sarkar D, Nagaya T, Koga K, Nomura Y, Gruener R, et al. (2000) Culture in vector-averaged gravity under clinostat rotation results in apoptosis of osteoblastic ROS 17/2.8 cells. *J Bone Miner Res* 15: 489–498.
- Schatten H, Lewis ML, Chakrabarti A (2001) Spaceflight and clinorotation cause cytoskeleton and mitochondria changes and increases in apoptosis in cultured cells. *Acta Astronaut* 49: 399–418.
- Margolis L, Hatfill S, Chuaqui R, Vocke C, Emmert-Buck M, et al. (1999) Long term organ culture of human prostate tissue in a NASA-designed rotating wall bioreactor. *J Urol* 161: 290–297.
- Yuge L, Kajiume T, Tahara H, Kawahara Y, Umeda C, et al. (2006) Microgravity potentiates stem cell proliferation while sustaining the capability of differentiation. *Stem Cells Dev* 15: 921–929.
- Makihira S, Kawahara Y, Yuge L, Mine Y, Nikawa H (2008) Impact of the microgravity environment in a 3-dimensional clinostat on osteoblast- and osteoclast-like cells. *Cell Biol Int* 32: 1176–1181.
- Yuge L, Hide I, Kumagai T, Kumei Y, Takeda S, et al. (2003) Cell differentiation and p38(MAPK) cascade are inhibited in human osteoblasts cultured in a three-dimensional clinostat. *In Vitro Cell Dev Biol Anim* 39: 89–97.
- Hirasaka K, Nikawa T, Yuge L, Ishihara I, Higashibata A, et al. (2005) Clinorotation prevents differentiation of rat myoblastic L6 cells in association with reduced NF- $\kappa$ B signaling. *Biochim Biophys Acta* 1743: 130–140.
- Kulesh DA, Anderson LH, Wilson B, Otis EJ, Elgin DM, et al. (1994) Space shuttle flight (STS-45) of L8 myoblast cells results in the isolation of a nonfusing cell line variant. *J Cell Biochem* 55: 530–544.
- Russomano T, Cardoso R, Falcao F, Dalmarco G, C VDS, et al. (2005) Development and Validation of a 3D Clinostat for the Study of Cells during Microgravity Simulation. *Conf Proc IEEE Eng Med Biol Soc* 1: 564–566.
- Engelmann U, Krassnigg F, Schill WB (1992) Sperm motility under conditions of weightlessness. *J Androl* 13: 433–436.
- Tash JS, Bracho GE (1999) Microgravity alters protein phosphorylation changes during initiation of sea urchin sperm motility. *Faseb J* 13 Suppl: S43–54.
- Ohta H, Sakaide Y, Wakayama T (2008) Long-term preservation of mouse spermatozoa as frozen testicular sections. *J Reprod Dev* 54: 295–298.
- Ohta H, Wakayama T (2004) Full-term development of offspring using round spermatids produced ectopically from fetal male germ cells. *J Reprod Dev* 50: 429–437.
- Wakayama S, Suetsugu R, Thuan NV, Ohta H, Kishigami S, et al. (2007) Establishment of mouse embryonic stem cell lines from somatic cell nuclei by nuclear transfer into aged, fertilization-failure mouse oocytes. *Curr Biol* 17: R120–121.
- Wakayama T, Tanemura K, Suto J, Imamura K, Fukuta K, et al. (1995) Production of term offspring by in vitro fertilization using old mouse spermatozoa. *J Vet Med Sci* 57: 545–547.
- Yamagata K, Suetsugu R, Wakayama T (2009) Assessment of chromosomal integrity using a novel live-cell imaging technique in mouse embryos produced by intracytoplasmic sperm injection. *Hum Reprod*.
- Palmieri SL, Peter W, Hess H, Scholer HR (1994) Oct-4 transcription factor is differentially expressed in the mouse embryo during establishment of the first two extraembryonic cell lineages involved in implantation. *Dev Biol* 166: 259–267.
- Dietrich JE, Hiragi T (2007) Stochastic patterning in the mouse preimplantation embryo. *Development* 134: 4219–4231.
- Jedrusek A, Parfitt DE, Guo G, Skamagki M, Grabarek JB, et al. (2008) Role of Cdx2 and cell polarity in cell allocation and specification of trophectoderm and inner cell mass in the mouse embryo. *Genes Dev* 22: 2692–2706.
- Niwa H, Toyooka Y, Shimosato D, Strumpf D, Takahashi K, et al. (2005) Interaction between Oct3/4 and Cdx2 determines trophectoderm differentiation. *Cell* 123: 917–929.
- Ralston A, Rossant J (2008) Cdx2 acts downstream of cell polarization to cell-autonomously promote trophectoderm fate in the early mouse embryo. *Dev Biol* 313: 614–629.
- Strumpf D, Mao CA, Yamanaka Y, Ralston A, Chawengsaksophak K, et al. (2005) Cdx2 is required for correct cell fate specification and differentiation of trophectoderm in the mouse blastocyst. *Development* 132: 2093–2102.
- Kojima Y, Sasaki S, Kubota Y, Ikeuchi T, Hayashi Y, et al. (2000) Effects of simulated microgravity on mammalian fertilization and preimplantation embryonic development in vitro. *Fertil Steril* 74: 1142–1147.
- Gualandris-Parisot L, Husson D, Bautz A, Durand D, Kan P, et al. (2002) Effects of space environment on embryonic growth up to hatching of salamander eggs fertilized and developed during orbital flights. *Biol Sci Space* 16: 3–11.
- Burden HW, Zary J, Alberts JR (1999) Effects of space flight on the immunohistochemical demonstration of connexin 26 and connexin 43 in the postpartum uterus of rats. *J Reprod Fertil* 116: 229–234.
- Burden HW, Zary J, Lawrence IE, Jonnalagadda P, Davis M, et al. (1997) Effects of space flight on ovarian-hypophyseal function in postpartum rats. *J Reprod Fertil* 109: 193–197.

Engineering for housing the mice. Financial support for this research was provided by a Scientific Research in Priority Areas (15080211) to T. W.

## Author Contributions

Conceived and designed the experiments: SW LY TW. Performed the experiments: SW YK CL KY TW. Analyzed the data: YK LY TW. Contributed reagents/materials/analysis tools: TW. Wrote the paper: LY TW.

48. Ronca AE (2003) Mammalian development in space. *Adv Space Biol Med* 9: 217–251.
49. Ronca AE, Alberts JR (2000) Effects of prenatal spaceflight on vestibular responses in neonatal rats. *J Appl Physiol* 89: 2318–2324.
50. Ronca AE, Alberts JR (2000) Physiology of a microgravity environment selected contribution: effects of spaceflight during pregnancy on labor and birth at 1 G. *J Appl Physiol* 89: 849–854; discussion 848.
51. Dournon C (2003) Developmental biology of urodele amphibians in microgravity conditions. *Adv Space Biol Med* 9: 101–131.
52. Ijiri K (1995) Fish mating experiment in space—what it aimed at and how it was prepared. *Biol Sci Space* 9: 3–16.
53. Chatot CL, Ziomek CA, Bavister BD, Lewis JL, Torres I (1989) An improved culture medium supports development of random-bred 1-cell mouse embryos in vitro. *J Reprod Fertil* 86: 679–688.
54. Lane M, Gardner DK (1992) Effect of incubation volume and embryo density on the development and viability of mouse embryos in vitro. *Hum Reprod* 7: 558–562.
55. Melin J, Lee A, Foygel K, Leong DE, Quake SR, et al. (2009) In vitro embryo culture in defined, sub-microliter volumes. *Dev Dyn* 238: 950–955.
56. Paria BC, Dey SK (1990) Preimplantation embryo development in vitro: cooperative interactions among embryos and role of growth factors. *Proc Natl Acad Sci U S A* 87: 4756–4760.
57. Ohta H, Sakaide Y, Yamagata K, Wakayama T (2008) Increasing the cell number of host tetraploid embryos can improve the production of mice derived from embryonic stem cells. *Biol Reprod* 79: 486–492.
58. Ohta H, Sakaide Y, Wakayama T (2008) Generation of mice derived from embryonic stem cells using blastocysts of different developmental ages. *Reproduction* 136: 581–587.
59. Ueda O, Yorozu K, Kamada N, Jishage K, Kawase Y, et al. (2003) Possible expansion of “Window of Implantation” in pseudopregnant mice: time of implantation of embryos at different stages of development transferred into the same recipient. *Biol Reprod* 69: 1085–1090.
